# Supplementary material
Source: PubMed Central journal article supplement (PMC6481629)
Supplement: NIHMS1523520-supplement-STROBE_Checklist.pdf [file NIHMS1523520-supplement-STROBE_Checklist.pdf]

STROBE Statement—Checklist of items that should be included in reports of *cohort studies*

|                           | <b>Item No</b> | <b>Recommendation</b>                                                                                                                                                                             | <b>Page Number in Manuscript</b>                    |
|---------------------------|----------------|---------------------------------------------------------------------------------------------------------------------------------------------------------------------------------------------------|-----------------------------------------------------|
| <b>Title and abstract</b> | 1              | (a) Indicate the study’s design with a commonly used term in the title or the abstract                                                                                                            | 1                                                   |
|                           |                | (b) Provide in the abstract an informative and balanced summary of what was done and what was found                                                                                               | 2                                                   |
| <b>Introduction</b>       |                |                                                                                                                                                                                                   |                                                     |
| Background/rationale      | 2              | Explain the scientific background and rationale for the investigation being reported                                                                                                              | 4,5                                                 |
| Objectives                | 3              | State specific objectives, including any prespecified hypotheses                                                                                                                                  | 5                                                   |
| <b>Methods</b>            |                |                                                                                                                                                                                                   |                                                     |
| Study design              | 4              | Present key elements of study design early in the paper                                                                                                                                           | 6                                                   |
| Setting                   | 5              | Describe the setting, locations, and relevant dates, including periods of recruitment, exposure, follow-up, and data collection                                                                   | 6,7                                                 |
| Participants              | 6              | (a) Give the eligibility criteria, and the sources and methods of selection of participants. Describe methods of follow-up                                                                        | 6,7,Supplementary Figure S1                         |
|                           |                | (b) For matched studies, give matching criteria and number of exposed and unexposed                                                                                                               | N/A                                                 |
| Variables                 | 7              | Clearly define all outcomes, exposures, predictors, potential confounders, and effect modifiers. Give diagnostic criteria, if applicable                                                          | 7,8,9,Supplementary Table S1                        |
| Data sources/measurement  | 8*             | For each variable of interest, give sources of data and details of methods of assessment (measurement). Describe comparability of assessment methods if there is more than one group              | 7,8,9,Supplementary Table S1                        |
| Bias                      | 9              | Describe any efforts to address potential sources of bias                                                                                                                                         | 9,Supplementary Table S2                            |
| Study size                | 10             | Explain how the study size was arrived at                                                                                                                                                         | 6,7,Supplementary Figure S1                         |
| Quantitative variables    | 11             | Explain how quantitative variables were handled in the analyses. If applicable, describe which groupings were chosen and why                                                                      | 9,10,Supplementary Table S2, Supplementary Table S3 |
| Statistical methods       | 12             | (a) Describe all statistical methods, including those used to control for confounding                                                                                                             | 9,10                                                |
|                           |                | (b) Describe any methods used to examine subgroups and interactions                                                                                                                               | 10                                                  |
|                           |                | (c) Explain how missing data were addressed                                                                                                                                                       | N/A                                                 |
|                           |                | (d) If applicable, explain how loss to follow-up was addressed                                                                                                                                    | 9,10                                                |
|                           |                | (e) Describe any sensitivity analyses                                                                                                                                                             | 10,Supplemental Material                            |
| <b>Results</b>            |                |                                                                                                                                                                                                   |                                                     |
| Participants              | 13*            | (a) Report numbers of individuals at each stage of study—eg numbers potentially eligible, examined for eligibility, confirmed eligible, included in the study, completing follow-up, and analysed | 12,Supplementary Figure S1                          |
|                           |                | (b) Give reasons for non-participation at each stage                                                                                                                                              | 12                                                  |
|                           |                | (c) Consider use of a flow diagram                                                                                                                                                                | Supplementary                                       |

|                          |     |                                                                                                                                                                                                              | Figure S1                                                                                             |
|--------------------------|-----|--------------------------------------------------------------------------------------------------------------------------------------------------------------------------------------------------------------|-------------------------------------------------------------------------------------------------------|
| Descriptive data         | 14* | (a) Give characteristics of study participants (eg demographic, clinical, social) and information on exposures and potential confounders                                                                     | 12,Table 1,Supplementary Table S5                                                                     |
|                          |     | (b) Indicate number of participants with missing data for each variable of interest                                                                                                                          | N/A                                                                                                   |
|                          |     | (c) Summarise follow-up time (eg, average and total amount)                                                                                                                                                  | N/A                                                                                                   |
| Outcome data             | 15* | Report numbers of outcome events or summary measures over time                                                                                                                                               | 13,Table 2                                                                                            |
| Main results             | 16  | (a) Give unadjusted estimates and, if applicable, confounder-adjusted estimates and their precision (eg, 95% confidence interval). Make clear which confounders were adjusted for and why they were included | 13,Supplementary Table S2,Supplementary Table S3                                                      |
|                          |     | (b) Report category boundaries when continuous variables were categorized                                                                                                                                    | N/A                                                                                                   |
|                          |     | (c) If relevant, consider translating estimates of relative risk into absolute risk for a meaningful time period                                                                                             | N/A                                                                                                   |
| Other analyses           | 17  | Report other analyses done—eg analyses of subgroups and interactions, and sensitivity analyses                                                                                                               | 13,14, Supplementary Table S5, Supplementary Table S6, Supplementary Table S7, Supplementary Table S8 |
| <b>Discussion</b>        |     |                                                                                                                                                                                                              |                                                                                                       |
| Key results              | 18  | Summarise key results with reference to study objectives                                                                                                                                                     | 14                                                                                                    |
| Limitations              | 19  | Discuss limitations of the study, taking into account sources of potential bias or imprecision. Discuss both direction and magnitude of any potential bias                                                   | 17,18,19                                                                                              |
| Interpretation           | 20  | Give a cautious overall interpretation of results considering objectives, limitations, multiplicity of analyses, results from similar studies, and other relevant evidence                                   | 15,16,17                                                                                              |
| Generalisability         | 21  | Discuss the generalisability (external validity) of the study results                                                                                                                                        | 18,19                                                                                                 |
| <b>Other information</b> |     |                                                                                                                                                                                                              |                                                                                                       |
| Funding                  | 22  | Give the source of funding and the role of the funders for the present study and, if applicable, for the original study on which the present article is based                                                | 20                                                                                                    |
