# Supplementary material
Source: PubMed Central journal article supplement (PMC6481629)
Supplement: NIHMS1523520-supplement-Supplemental_Material.pdf [file NIHMS1523520-supplement-Supplemental_Material.pdf]

## **SUPPLEMENTARY MATERIAL**

**Supplementary Table S1.** List of Individual Beta-Blocker, Statin, Antiplatelet, and Renin Angiotensin Aldosterone System (RAAS) Medications Considered in the Study and Details about Medication Exposure Definition.

**Supplementary Table S2.** Variables included in the propensity score estimation model.

**Supplementary Table S3.** Distribution of the inverse probability of treatment weights and covariate balance between treatment groups before and after inverse probability of treatment weighting.

**Supplementary Table S4.** Combinations of medication classes dispensed after acute myocardial infarction among frail, older nursing home residents.

**Supplementary Table S5.** Effect of the number of medication classes on outcomes among nursing home residents after myocardial infarction stratified by age categories.

**Supplementary Table S6.** Effect of the number of medication classes on outcomes among frail, older nursing home residents after myocardial infarction with weight truncation at the 1<sup>st</sup> and 99<sup>th</sup> percentiles.

**Supplementary Table S7.** Effect of the number of medication classes on outcomes among frail, older nursing home residents after myocardial infarction after adjustment for covariates with absolute standardized mean differences greater than 0.08 after inverse probability of treatment weighting.

**Supplementary Table S8.** Effect of the number of medication classes after excluding antiplatelet agents (beta-blockers, statins, and renin-angiotensin-aldosterone system inhibitors only) from the exposure definition (N=4,634).

**Supplementary Figure S1.** Flow diagram of study participant inclusion and exclusion.

**Supplementary Table S1.** List of Individual Beta-Blocker, Statin, Antiplatelet, and Renin Angiotensin Aldosterone System (RAAS) Medications\* Considered in the Study and Details about Medication Exposure Definition

*Details of the complementary approaches used to ascertain secondary prevention medication exposure, including a validation cohort using complete prescription drug dispensing data from a large, national private NH chain (HCR ManorCare, Inc., Toledo, OH), are described elsewhere.<sup>1-3</sup> In brief, those approaches are important because Medicare Part D drug dispensing claims are not generated while NH residents receive care through the Skilled Nursing Facility (SNF) benefit.<sup>1-3</sup>*

| <b>Drug Class</b> | <b>Individual Drugs</b> |
|-------------------|-------------------------|
| Beta-Blockers     | Acebutolol              |
|                   | Atenolol                |
|                   | Betaxolol               |
|                   | Bisoprolol              |
|                   | Carvedilol              |
|                   | Labetalol               |
|                   | Metoprolol              |
|                   | Nadolol                 |
|                   | Nebivolol               |
|                   | Penbutolol              |
|                   | Pindolol                |
|                   | Propranolol             |
|                   | Timolol                 |

---

Statins

Atorvastatin

Fluvastatin

Lovastatin

Pitavastatin

Pravastatin

Rosuvastatin

Simvastatin

Antiplatelets

Clopidogrel

Angiotensin Converting Enzyme Inhibitors

Captopril

Benazepril

Enalapril

Fosinopril

Lisinopril

Moexipril

Perindopril

Quinapril

Ramipril

Trandolapril

Angiotensin Receptor Blockers

Candesartan

Eprosartan

Irbesartan

Losartan

Olmesartan

---

---

Telmisartan

Valsartan

---

\*Only the oral formulation of all medications was considered.

---

**Supplementary Table S2.** Variables included in the propensity score estimation model.

*Part A claims were also used to document characteristics of the recent AMI hospital course (including procedures), severity of cardiovascular disease, and the Elixhauser Comorbidity Index score.<sup>4</sup> Pre-AMI medication use was included as a marker of residents' clinically active conditions and risk of future clinical events (e.g., residents prescribed warfarin may be at higher risk of future cerebrovascular hospitalizations). A number of MDS items have been structured into reliable, valid measures of resident functional status.<sup>5-7</sup> The level of functional impairment for each resident was estimated with the MDS ADL score.<sup>8</sup> Cognitive function was measured with the Cognitive Performance Scale; scores range from 0 (intact) to 6 (severe impairment).<sup>6</sup> Other geriatric syndromes (weight loss, falls, presence and frequency of pain, and Changes in Health, End-Stage Disease, Signs, and Symptoms Scale (CHESS) score) and do not resuscitate (DNR) order status were also measured in the MDS. Facility characteristics and indicators of care quality were obtained from the most recent OSCAR survey before the acute AMI hospitalization.*

| <b>Variable Name</b> | <b>Data Source</b> | <b>Description</b>                                                                                                                             |
|----------------------|--------------------|------------------------------------------------------------------------------------------------------------------------------------------------|
| chess_nh             | MDS                | Comorbidity index, Changes in Health, End-stage disease, and Signs and Symptoms (CHESS) Scale (0 to 5) 0=Not at all unstable,5=Highly unstable |
| CXBREAT_max<br>back  | MDS                | Binary indicator of presence of shortness of breath in prior 7 days on last MDS assessment prior to index MI                                   |

|                 |     |                                                                                                                                                                                               |
|-----------------|-----|-----------------------------------------------------------------------------------------------------------------------------------------------------------------------------------------------|
| cxdizz_maxback  | MDS | Binary indicator of presence of dizziness/vertigo in prior 7 days on last MDS assessment prior to index MI                                                                                    |
| CXFL180_maxback | MDS | Binary indicator of presence of fell in the past 31 to 180 days on last MDS assessment prior to index MI                                                                                      |
| CXPAIN_maxback  | MDS | Categorical variable for highest level of pain present in the prior 7 days (i.e., frequency with which resident complains or shows evidence of pain) on last MDS assessment prior to index MI |
| CXSYNCO_maxback | MDS | Binary indicator of presence of syncope/fainting in prior 7 days on last MDS assessment prior to index MI                                                                                     |
| dmrace          | MDS | Race/ethnicity                                                                                                                                                                                |
| dmsex           | MDS | Gender                                                                                                                                                                                        |
| idage           | MDS | Age at assessment                                                                                                                                                                             |
| nhlos           | MDS | Nursing home length of stay before MI (calculated using residential history file algorithm)                                                                                                   |
| ORWTLOS         | MDS | Weight loss (recent history of weight loss)                                                                                                                                                   |
| phadld          | MDS | Morris additive ADL scale 0-28 (baseline)                                                                                                                                                     |
| phadld*phadld   | MDS | Quadratic term for Morris additive ADL scale 0-28 (baseline)                                                                                                                                  |

|           |       |                                                        |
|-----------|-------|--------------------------------------------------------|
| phcps     | MDS   | Fries & Morris CPS index (cognitive performance score) |
| rhftype   | MDS   | Residential facility type                              |
| RXANXIE   | MDS   | # of days antianxiety/hypnotics                        |
| RXDEPRE   | MDS   | # of days antidepressants                              |
| RXHYPNO   | MDS   | # of days received hypnotic                            |
| RXNUMBE   | MDS   | Number of meds in last 7 days                          |
| RXPSYCH   | MDS   | # of days received antipsychotics                      |
| Dnr       | MDS   | Do not resuscitate order                               |
| dchrppd   | OSCAR | Total direct care (RN/LPN/CNA) hrs/day/resident        |
| lpn100t   | OSCAR | Total LPN FTEs/100 beds                                |
| md100t    | OSCAR | Total MD FTEs/100 beds                                 |
| mdex100t  | OSCAR | Total MD extender FTEs/100 beds                        |
| multifac  | OSCAR | Facility is part of a chain                            |
| n_qol_def | OSCAR | OSCAR: quality-of-life deficiency score                |
| occrate   | OSCAR | OSCAR: Occupancy rate (range 0-1)                      |
| owner     | OSCAR | Type of owner of nursing home                          |

|                          |        |                                                                               |
|--------------------------|--------|-------------------------------------------------------------------------------|
| paymcaid                 | OSCAR  | Pct Medicaid patients in nursing home                                         |
| paymcare                 | OSCAR  | Pct Medicare patients in nursing home                                         |
| payoth2                  | OSCAR  | Pct Other payer; excl Medicare residents                                      |
| prov0740                 | OSCAR  | Total number of nursing home facility beds                                    |
| psychact                 | OSCAR  | % receiving psychoactive drugs                                                |
| psycha*psycha*<br>psycha | OSCAR  | Cubic term for % receiving psychoactive drugs                                 |
| psychdx                  | OSCAR  | Pct with psychiatric diagnosis                                                |
| pt100t                   | OSCAR  | Total physical therapy FTEs/100 beds                                          |
| restrain                 | OSCAR  | Pct physically restrained                                                     |
| rn100t                   | OSCAR  | Total RN FTEs/100 beds                                                        |
| rn100t*rn100t            | OSCAR  | Quadratic term for total RN FTEs/100 beds                                     |
| az_af                    | Part A | Binary indicator of presence of atrial fibrillation in 1 yr prior to index MI |
| az_alzheimers            | Part A | Binary indicator of presence of Alzheimer's disease in 1 yr prior to index MI |
| az_angina_pecto<br>ris   | Part A | Binary indicator of presence of angina pectoris in 1 yr prior to index MI     |



|                     |        |                                                                                                 |
|---------------------|--------|-------------------------------------------------------------------------------------------------|
| az_arthritis        | Part A | Binary indicator of presence of arthritis in 1 yr prior to index MI                             |
| az_asthma           | Part A | Binary indicator of presence of asthma in 1 yr prior to index MI                                |
| az_CHF              | Part A | Binary indicator of presence of congestive heart failure in 1 yr prior to index MI              |
| az_cop              | Part A | Binary indicator of presence of chronic obstructive pulmonary disease in 1 yr prior to index MI |
| az_depression       | Part A | Binary indicator of presence of depression in 1 yr prior to index MI                            |
| az_dm               | Part A | Binary indicator of presence of diabetes mellitus in 1 yr prior to index MI                     |
| az_dyslipidemia     | Part A | Binary indicator of presence of dyslipidemia in 1 yr prior to index MI                          |
| az_hypertension     | Part A | Binary indicator of presence of hypertension in 1 yr prior to index MI                          |
| az_hypothyroidism   | Part A | Binary indicator of presence of hypothyroidism in 1 yr prior to index MI                        |
| az_obesity          | Part A | Binary indicator of presence of obesity in 1 yr prior to index MI                               |
| az_osteoporosis     | Part A | Binary indicator of presence of osteoporosis in 1 yr prior to index MI                          |
| az_pvd              | Part A | Binary indicator of presence of peripheral vascular disease in 1 yr prior to index MI           |
| az_tachyarrhythmias | Part A | Binary indicator of presence of arrhythmias in 1 yr prior to index MI                           |

|                    |        |                                                                                                                                 |
|--------------------|--------|---------------------------------------------------------------------------------------------------------------------------------|
| az_unstable_angina | Part A | Binary indicator of presence of unstable angina in 1 yr prior to index MI                                                       |
| hosp_count_1yr     | Part A | Number of hospitalizations in 1 yr prior to index MI, from part A inpt                                                          |
| ICU_CCU_group      | Part A | Group: Number of days at ICU or CCU during index MI hosp stay                                                                   |
| los_mi_stay        | Part A | Number of days in the hospital during index MI hospital stay                                                                    |
| pcicabg            | Part A | Coronary revascularization or angioplasty procedures performed during the acute myocardial infarction hospitalization           |
| max_hielix         | Part A | Max of Elixhauser among hospitalizations in 1 yr prior to the index MI, from Part A inpt                                        |
| d_alpha_adrenergic | Part D | Binary indicator of presence of alpha 2 adrenergic agonist drug (e.g. clonidine, guanfacine) in 1 yr prior to index MI          |
| d_analgesic_comb   | Part D | Binary indicator of presence of combination opioid analgesic drug (e.g. acetaminophen with oxycodone) in 1 yr prior to index MI |
| d_analgesic_opioid | Part D | Binary indicator of presence of opioid analgesic drug (e.g. oxycodone) in 1 yr prior to index MI                                |
| d_Antiarrhythmic   | Part D | Binary indicator of presence of class Ib antiarrhythmic drug (e.g., lidocaine or phenytoin) in 1                                |

|                          |        |                                                                                                                                                                           |
|--------------------------|--------|---------------------------------------------------------------------------------------------------------------------------------------------------------------------------|
| c_Ib                     |        | yr prior to index MI                                                                                                                                                      |
| d_Antiarrhythmi<br>c_III | Part D | Binary indicator of presence of class III antiarrhythmic drug (e.g., amiodarone, sotalol, dofetilide) in 1 yr prior to index MI                                           |
| d_Antiarrhythmi<br>c_IV  | Part D | Binary indicator of presence of class IV antiarrhythmic drug (i.e., non-dihydropyridine calcium channel blockers, e.g., diltiazem or verapamil) in 1 yr prior to index MI |
| d_Antiarrhythmi<br>c_mis | Part D | Binary indicator of presence of antiarrhythmic drug (misc) in 1 yr prior to index MI                                                                                      |
| d_Anticholinergi<br>c    | Part D | Binary indicator of presence of anticholinergic drug (e.g., ipratroium, tiotropium) in 1 yr prior to index MI                                                             |
| d_Anticoagulant          | Part D | Binary indicator of presence of anticoagulant (e.g., dabigatran) in 1 yr prior to index MI                                                                                |
| d_Anticoagulant<br>_cou  | Part D | Binary indicator of presence of coumarin derivative anticoagulant (e.g., warfarin) in 1 yr prior to index MI                                                              |
| d_Antidepressant<br>_SAR | Part D | Binary indicator of presence of antidepressant in 1 yr prior to index MI                                                                                                  |
| d_Antidepressant<br>_SNR | Part D | Binary indicator of presence of SNRI antidepressant in 1 yr prior to index MI                                                                                             |

|                          |        |                                                                                                                                      |
|--------------------------|--------|--------------------------------------------------------------------------------------------------------------------------------------|
| d_Antidepressant<br>_SSR | Part D | Binary indicator of presence of SSRI antidepressant in 1 yr prior to index MI                                                        |
| d_Antilipemic_2<br>Azeti | Part D | Binary indicator of presence of 2-azetidinone antilipemic drug (e.g., ezetimibe) in 1 yr prior to index MI                           |
| d_Antilipemic_B<br>CS    | Part D | Binary indicator of presence of bile acid sequestrant antilipemic drug (e.g., cholestyramine, colesevelam) in 1 yr prior to index MI |
| d_Antilipemic_F<br>ibric | Part D | Binary indicator of presence of fibric acid antilipemic drug (e.g., gemfibrozil, fenofibrate) in 1 yr prior to index MI              |
| d_antiparkinson_<br>Dopa | Part D | Binary indicator of presence of dopamine agonist drug in 1 yr prior to index MI                                                      |
| d_Antipsychotic<br>_atyp | Part D | Binary indicator of presence of atypical antipsychotic drug in 1 yr prior to index MI                                                |
| d_Antipsychotic<br>_typi | Part D | Binary indicator of presence of typical antipsychotic drug in 1 yr prior to index MI                                                 |
| d_Benzodiazepin<br>e     | Part D | Binary indicator of presence of benzodiazepine drug (e.g., alprazolam, lorazepam) in 1 yr prior to index MI                          |

|                          |        |                                                                                                                                      |
|--------------------------|--------|--------------------------------------------------------------------------------------------------------------------------------------|
| d_Calcium                | Part D | Binary indicator of presence of calcium channel blocker drug (e.g., amlodipine) in 1 yr prior to index MI                            |
| d_Diuretic_Loop          | Part D | Binary indicator of presence of loop diuretic drug (e.g., furosemide) in 1 yr prior to index MI                                      |
| d_Diuretic_Potas<br>sium | Part D | Binary indicator of presence of potassium-sparing diuretic drug (e.g., spironolactone) in 1 yr prior to index MI                     |
| d_Diuretic_Thia<br>zide  | Part D | Binary indicator of presence of thiazide diuretic drug (e.g., hydrochlorothiazide) in 1 yr prior to index MI                         |
| d_Diuretic_Thia<br>zide_ | Part D | Binary indicator of presence of thiazide-related diuretic in 1 yr prior to index MI                                                  |
| d_Hypnotic               | Part D | Binary indicator of presence of nonbenzodiazpine hypnotic drug (e.g. zolpidem) in 1 yr prior to index MI                             |
| d_LMWH                   | Part D | Binary indicator of presence of low molecular weight heparin anticoagulant drug (e.g. enoxaparin) in 1 yr prior to index MI          |
| d_nitrate                | Part D | Binary indicator of presence of nitrate drug (nitroglycerin, isosorbide mononitrate, isosorbide dinitrate) in 1 yr prior to index MI |
| d_NSAID_cox2             | Part D | Binary indicator of presence of cox-2 selective non-steroidal anti-inflammatory drug (e.g.                                           |

|               |        |                                                                                                             |
|---------------|--------|-------------------------------------------------------------------------------------------------------------|
|               |        | celecoxib) in 1 yr prior to index MI                                                                        |
| d_Vasodilator | Part D | Binary indicator of presence of direct-acting vasodilator drug (e.g. hydralazine) in 1 yr prior to index MI |

**Supplementary Table S3.** Distribution of the inverse probability of treatment weights and covariate\* balance between treatment groups before and after inverse probability of treatment weighting.

*The inverse probability of treatment weights had a mean (standard deviation) of 1.00 (0.49) and ranged from 0.33 to 9.23.*

| Variable | Absolute Standardized Mean Differences |            |                  |            |                  |            |
|----------|----------------------------------------|------------|------------------|------------|------------------|------------|
|          | 2 vs 1 Meds                            |            | 3 or 4 vs 2 Meds |            | 3 or 4 vs 1 Meds |            |
|          | Before IPTW                            | After IPTW | Before IPTW      | After IPTW | Before IPTW      | After IPTW |
| dmrace   | 0.00                                   | 0.01       | 0.06             | 0.04       | 0.06             | 0.05       |
| dmsex    | 0.01                                   | 0.01       | 0.12             | 0.06       | 0.11             | 0.05       |
| idage    | 0.15                                   | 0.06       | 0.18             | 0.05       | 0.33             | 0.10       |
| phadld   | 0.10                                   | 0.05       | 0.10             | 0.03       | 0.20             | 0.08       |
| phcps    | 0.09                                   | 0.01       | 0.13             | 0.06       | 0.22             | 0.07       |
| dnr      | 0.01                                   | 0.05       | 0.11             | 0.03       | 0.20             | 0.08       |
| chess_nh | 0.00                                   | 0.00       | 0.06             | 0.05       | 0.06             | 0.05       |
| rhftype  | 0.08                                   | 0.03       | 0.01             | 0.01       | 0.09             | 0.03       |
| nhlos    | 0.08                                   | 0.03       | 0.07             | 0.00       | 0.16             | 0.03       |
| rxpsych  | 0.04                                   | 0.02       | 0.02             | 0.00       | 0.06             | 0.03       |
| rxanxie  | 0.05                                   | 0.04       | 0.04             | 0.05       | 0.01             | 0.01       |
| rxdepre  | 0.03                                   | 0.02       | 0.05             | 0.06       | 0.01             | 0.04       |
| rxhypno  | 0.04                                   | 0.03       | 0.01             | 0.02       | 0.03             | 0.01       |

|                    |      |      |      |      |      |      |
|--------------------|------|------|------|------|------|------|
| psychdx            | 0.02 | 0.00 | 0.04 | 0.03 | 0.02 | 0.03 |
| psychact           | 0.04 | 0.03 | 0.02 | 0.01 | 0.07 | 0.02 |
| orwtlos            | 0.03 | 0.02 | 0.03 | 0.03 | 0.06 | 0.06 |
| CXBREAT_maxback    | 0.01 | 0.01 | 0.01 | 0.01 | 0.02 | 0.02 |
| CXSYNCO_maxback    | 0.01 | 0.01 | 0.02 | 0.01 | 0.03 | 0.02 |
| cxdizz_maxback     | 0.02 | 0.02 | 0.00 | 0.01 | 0.02 | 0.00 |
| CXFL180_maxback    | 0.09 | 0.05 | 0.03 | 0.00 | 0.11 | 0.05 |
| CXPAIN_maxback     | 0.02 | 0.02 | 0.05 | 0.04 | 0.03 | 0.02 |
| rxnumbe            | 0.07 | 0.05 | 0.04 | 0.01 | 0.12 | 0.06 |
| az_CHF             | 0.14 | 0.05 | 0.05 | 0.01 | 0.08 | 0.06 |
| az_af              | 0.01 | 0.00 | 0.15 | 0.09 | 0.15 | 0.10 |
| az_alzheimers      | 0.02 | 0.01 | 0.03 | 0.00 | 0.05 | 0.01 |
| az_angina_pectoris | 0.11 | 0.03 | 0.07 | 0.05 | 0.17 | 0.08 |
| az_arthritis       | 0.02 | 0.02 | 0.01 | 0.02 | 0.03 | 0.04 |
| az_asthma          | 0.06 | 0.05 | 0.02 | 0.02 | 0.04 | 0.03 |
| az_cop             | 0.01 | 0.03 | 0.04 | 0.02 | 0.03 | 0.01 |
| az_depression      | 0.02 | 0.00 | 0.03 | 0.03 | 0.05 | 0.03 |
| az_dm              | 0.07 | 0.04 | 0.15 | 0.06 | 0.22 | 0.09 |
| az_dyslipidemia    | 0.16 | 0.04 | 0.26 | 0.07 | 0.42 | 0.11 |
| az_hypertension    | 0.08 | 0.02 | 0.16 | 0.07 | 0.24 | 0.09 |
| az_hypothyroidism  | 0.01 | 0.03 | 0.06 | 0.05 | 0.07 | 0.07 |
| az_obesity         | 0.00 | 0.01 | 0.01 | 0.04 | 0.01 | 0.04 |
| az_osteoporosis    | 0.01 | 0.01 | 0.00 | 0.02 | 0.01 | 0.01 |



|                     |      |      |      |      |      |      |
|---------------------|------|------|------|------|------|------|
| az_pvd              | 0.02 | 0.02 | 0.07 | 0.04 | 0.10 | 0.06 |
| az_tachyarrhythmias | 0.01 | 0.02 | 0.02 | 0.02 | 0.01 | 0.00 |
| az_unstable_angina  | 0.00 | 0.01 | 0.00 | 0.03 | 0.00 | 0.04 |
| hosp_count_1yr      | 0.05 | 0.01 | 0.04 | 0.02 | 0.09 | 0.01 |
| ICU_CCU_group       | 0.06 | 0.02 | 0.09 | 0.05 | 0.15 | 0.07 |
| los_mi_stay         | 0.03 | 0.03 | 0.13 | 0.06 | 0.16 | 0.08 |
| pcicabg             | 0.06 | 0.01 | 0.08 | 0.04 | 0.13 | 0.06 |
| max_hielix          | 0.05 | 0.00 | 0.01 | 0.02 | 0.06 | 0.02 |
| owner               | 0.02 | 0.00 | 0.00 | 0.00 | 0.02 | 0.01 |
| prov0740            | 0.04 | 0.02 | 0.02 | 0.00 | 0.06 | 0.02 |
| dchrppd             | 0.01 | 0.00 | 0.01 | 0.01 | 0.02 | 0.01 |
| lpn100t             | 0.04 | 0.01 | 0.02 | 0.01 | 0.06 | 0.02 |
| md100t              | 0.04 | 0.03 | 0.04 | 0.01 | 0.07 | 0.04 |
| mdex100t            | 0.02 | 0.02 | 0.09 | 0.05 | 0.06 | 0.02 |
| multifac            | 0.02 | 0.01 | 0.03 | 0.05 | 0.05 | 0.06 |
| n_qol_def_wt_z      | 0.05 | 0.01 | 0.01 | 0.00 | 0.05 | 0.02 |
| occrate             | 0.02 | 0.00 | 0.01 | 0.01 | 0.01 | 0.01 |
| paymcaid            | 0.08 | 0.03 | 0.05 | 0.04 | 0.03 | 0.01 |
| paymcare            | 0.08 | 0.02 | 0.01 | 0.02 | 0.07 | 0.00 |
| payoth2             | 0.07 | 0.03 | 0.04 | 0.04 | 0.04 | 0.02 |
| pt100t              | 0.07 | 0.05 | 0.06 | 0.06 | 0.00 | 0.01 |
| restrain            | 0.02 | 0.01 | 0.01 | 0.00 | 0.03 | 0.01 |
| rn100t              | 0.02 | 0.01 | 0.00 | 0.02 | 0.02 | 0.01 |

|                      |      |      |      |      |      |      |
|----------------------|------|------|------|------|------|------|
| d_Anticoagulant      | 0.03 | 0.03 | 0.00 | 0.02 | 0.03 | 0.01 |
| d_Anticoagulant_cou  | 0.13 | 0.06 | 0.03 | 0.01 | 0.16 | 0.08 |
| d_Calcium            | 0.04 | 0.01 | 0.01 | 0.03 | 0.03 | 0.02 |
| d_Diuretic_Loop      | 0.14 | 0.06 | 0.13 | 0.04 | 0.27 | 0.10 |
| d_Diuretic_Potassium | 0.02 | 0.01 | 0.13 | 0.10 | 0.16 | 0.09 |
| d_Diuretic_Thiazide  | 0.03 | 0.01 | 0.02 | 0.02 | 0.05 | 0.03 |
| d_Diuretic_Thiazide_ | 0.02 | 0.00 | 0.03 | 0.01 | 0.05 | 0.01 |
| d_Vasodilator        | 0.09 | 0.04 | 0.06 | 0.03 | 0.15 | 0.06 |
| d_antiparkinson_Dopa | 0.03 | 0.00 | 0.06 | 0.06 | 0.09 | 0.06 |
| d_analgesic_opioid   | 0.07 | 0.03 | 0.08 | 0.05 | 0.15 | 0.08 |
| d_Antidepressant_SSR | 0.12 | 0.05 | 0.07 | 0.02 | 0.20 | 0.07 |
| d_Antilipemic_Fibric | 0.02 | 0.03 | 0.06 | 0.07 | 0.04 | 0.03 |
| d_Antilipemic_2Azeti | 0.00 | 0.01 | 0.02 | 0.02 | 0.02 | 0.01 |
| d_Antilipemic_BCS    | 0.04 | 0.03 | 0.03 | 0.02 | 0.07 | 0.05 |
| d_Antipsychotic_atyp | 0.00 | 0.03 | 0.05 | 0.03 | 0.05 | 0.00 |
| d_Antipsychotic_typi | 0.01 | 0.01 | 0.04 | 0.04 | 0.05 | 0.03 |
| d_Antidepressant_SAR | 0.07 | 0.06 | 0.03 | 0.04 | 0.05 | 0.01 |
| d_Antidepressant_SNR | 0.01 | 0.01 | 0.03 | 0.02 | 0.03 | 0.01 |
| d_alpha_adrenergic   | 0.02 | 0.00 | 0.02 | 0.06 | 0.00 | 0.05 |
| d_Benzodiazepine     | 0.00 | 0.00 | 0.01 | 0.02 | 0.01 | 0.01 |
| d_LMWH               | 0.02 | 0.01 | 0.01 | 0.01 | 0.04 | 0.00 |
| d_Antiarrhythmic_Ib  | 0.06 | 0.03 | 0.02 | 0.01 | 0.08 | 0.04 |
| d_Antiarrhythmic_III | 0.11 | 0.06 | 0.01 | 0.03 | 0.10 | 0.04 |

|                      |      |      |      |      |      |      |
|----------------------|------|------|------|------|------|------|
| d_Antiarrhythmic_IV  | 0.01 | 0.02 | 0.01 | 0.01 | 0.00 | 0.03 |
| d_Antiarrhythmic_mis | 0.10 | 0.03 | 0.11 | 0.07 | 0.22 | 0.09 |
| d_Hypnotic           | 0.05 | 0.04 | 0.02 | 0.04 | 0.03 | 0.00 |
| d_Anticholinergic    | 0.08 | 0.04 | 0.09 | 0.03 | 0.16 | 0.06 |
| d_NSAID_cox2         | 0.01 | 0.02 | 0.02 | 0.01 | 0.03 | 0.01 |
| d_analgesic_comb     | 0.09 | 0.05 | 0.01 | 0.03 | 0.10 | 0.02 |
| d_nitrate            | 0.08 | 0.02 | 0.05 | 0.02 | 0.13 | 0.05 |

\* A label and description for each covariate can be found in Supplementary Table S2.

**Supplementary Table S4.** Combinations of medication classes dispensed after acute myocardial infarction among frail, older nursing home residents.

| Number of Medications                | Beta-blockers | RAAS Inhibitors | Statins       | Antiplatelets | n             | %           |
|--------------------------------------|---------------|-----------------|---------------|---------------|---------------|-------------|
| 4                                    | Yes           | Yes             | Yes           | Yes           | 388           | 8.11        |
| 3                                    | Yes           | No              | Yes           | Yes           | 317           | 6.62        |
|                                      | Yes           | Yes             | No            | Yes           | 207           | 4.32        |
|                                      | Yes           | Yes             | Yes           | No            | 421           | 8.79        |
|                                      | No            | Yes             | Yes           | Yes           | 57            | 1.19        |
| 2                                    | Yes           | No              | No            | Yes           | 266           | 5.56        |
|                                      | Yes           | No              | Yes           | No            | 450           | 9.4         |
|                                      | Yes           | Yes             | No            | No            | 593           | 12.39       |
|                                      | No            | No              | Yes           | Yes           | 91            | 1.9         |
|                                      | No            | Yes             | No            | Yes           | 55            | 1.15        |
|                                      | No            | Yes             | Yes           | No            | 117           | 2.44        |
| 1                                    | Yes           | No              | No            | No            | 1206          | 25.19       |
|                                      | No            | No              | No            | Yes           | 153           | 3.2         |
|                                      | No            | No              | Yes           | No            | 187           | 3.91        |
|                                      | No            | Yes             | No            | No            | 279           | 5.83        |
| n (%) of cohort receiving each class | 3,848 (80.38) | 2,117 (44.22)   | 2,028 (42.36) | 1,534 (32.05) | Total N=4,787 | Total %=100 |

Abbreviations: RAAS, renin-angiotensin-aldosterone system.

**Supplementary Table S5.** Effect of the number of medication classes on outcomes among nursing home residents after myocardial infarction stratified by age categories.

| <b>Outcome</b>    | <b>Age Categories</b> | <b>No. of Medications</b> | <b>Events / n</b> | <b>Risk (%)</b> | <b>Crude OR (95% CI)</b> | <b>IPTW OR (95% CI)</b> | <b>P for Effect Modification*</b> |
|-------------------|-----------------------|---------------------------|-------------------|-----------------|--------------------------|-------------------------|-----------------------------------|
| Mortality         | <=85                  | 1                         | 94 / 923          | 10.2            | Reference                | Reference               | 0.33                              |
|                   |                       | 2                         | 95 / 895          | 10.6            | 1.05 (0.78-1.42)         | 1.16 (0.84-1.59)        |                                   |
|                   |                       | 3 or 4                    | 57 / 886          | 6.4             | 0.61 (0.43-0.86)         | 0.79 (0.54-1.15)        |                                   |
|                   | >85                   | 1                         | 134 / 902         | 14.9            | Reference                | Reference               |                                   |
|                   |                       | 2                         | 83 / 677          | 12.3            | 0.80 (0.60-1.08)         | 0.83 (0.61-1.13)        |                                   |
|                   |                       | 3 or 4                    | 46 / 504          | 9.1             | 0.58 (0.40-0.82)         | 0.70 (0.48-1.04)        |                                   |
| Rehospitalization | <=85                  | 1                         | 255 / 923         | 27.6            | Reference                | Reference               | 0.30                              |
|                   |                       | 2                         | 269 / 895         | 30.1            | 1.12 (0.91-1.38)         | 1.06 (0.85-1.32)        |                                   |
|                   |                       | 3 or 4                    | 239 / 886         | 27.0            | 0.93 (0.75-1.14)         | 0.90 (0.70-1.17)        |                                   |
|                   | >85                   | 1                         | 194 / 902         | 21.5            | Reference                | Reference               |                                   |
|                   |                       | 2                         | 144 / 677         | 21.3            | 0.94 (0.73-1.20)         | 0.93 (0.72-1.20)        |                                   |
|                   |                       | 3 or 4                    | 122 / 504         | 24.2            | 1.06 (0.82-1.38)         | 1.08 (0.80-1.45)        |                                   |

|            |      |        |           |      |                  |                  |      |
|------------|------|--------|-----------|------|------------------|------------------|------|
| Functional | <=85 | 1      | 149 / 923 | 16.1 | Reference        | Reference        | 0.29 |
| Decline    |      | 2      | 163 / 895 | 18.2 | 1.17 (0.91-1.50) | 0.94 (0.71-1.24) |      |
|            |      | 3 or 4 | 204 / 886 | 23.0 | 1.50 (1.18-1.90) | 1.13 (0.85-1.49) |      |
|            | >85  | 1      | 110 / 902 | 12.2 | Reference        | Reference        |      |
|            |      | 2      | 111 / 677 | 16.4 | 1.37 (1.02-1.82) | 1.23 (0.91-1.67) |      |
|            |      | 3 or 4 | 83 / 504  | 16.5 | 1.32 (0.97-1.81) | 1.11 (0.76-1.60) |      |

Abbreviations: OR, odds ratio; CI, confidence interval; IPTW, inverse probability of treatment-weighted.

\*Presented for the IPTW estimates only.

**Supplementary Table S6.** Effect of the number of medication classes on outcomes among frail, older nursing home residents after myocardial infarction with weight truncation at the 1<sup>st</sup> and 99<sup>th</sup> percentiles.

*In a stability analysis, we truncated the IPTW at the 1<sup>st</sup> and 99<sup>th</sup> percentiles to explore the tradeoff between bias and variance.<sup>9</sup>*

| <b>Outcome</b>     | <b>No. of Medications</b> | <b>Truncated IPTW OR (95% CI)</b> |
|--------------------|---------------------------|-----------------------------------|
| Mortality          | 1                         | Reference                         |
|                    | 2                         | 0.97 (0.78-1.21)                  |
|                    | 3 or 4                    | 0.75 (0.57-0.98)                  |
| Rehospitalization  | 1                         | Reference                         |
|                    | 2                         | 1.00 (0.85-1.18)                  |
|                    | 3 or 4                    | 0.95 (0.79-1.14)                  |
| Functional Decline | 1                         | Reference                         |
|                    | 2                         | 1.08 (0.88-1.31)                  |
|                    | 3 or 4                    | 1.15 (0.93-1.42)                  |

Abbreviations: OR, odds ratio; CI, confidence interval; IPTW, inverse probability of treatment-weighted.

**Supplementary Table S7.** Effect of the number of medication classes on outcomes among frail, older nursing home residents after myocardial infarction after adjustment for covariates\* with absolute standardized mean differences greater than 0.08 after inverse probability of treatment weighting.

*In a second stability analysis, we included covariates with absolute standardized mean differences greater than 0.08 (Supplementary Table S3) after IP weighting in the outcome models to account for any potential residual confounding bias.*

| <b>Outcome</b>     | <b>No. of Medications</b> | <b>Covariate-Adjusted IPTW OR (95% CI)</b> |
|--------------------|---------------------------|--------------------------------------------|
| Mortality          | 1                         | Reference                                  |
|                    | 2                         | 0.98 (0.78-1.22)                           |
|                    | 3 or 4                    | 0.74 (0.56-0.97)                           |
| Rehospitalization  | 1                         | Reference                                  |
|                    | 2                         | 1.00 (0.84-1.19)                           |
|                    | 3 or 4                    | 0.95 (0.79-1.15)                           |
| Functional Decline | 1                         | Reference                                  |
|                    | 2                         | 1.06 (0.86-1.29)                           |
|                    | 3 or 4                    | 1.15 (0.93-1.44)                           |

Abbreviations: OR, odds ratio; CI, confidence interval; IPTW, inverse probability of treatment-weighted.

\*Covariates adjusted for included d\_Diuretic\_Potassium, az\_af, az\_hypertension, d\_Antiarrhythmic\_misc, d\_Diuretic\_Loop, az\_dm, idage, az\_dyslipidemia, az\_angina\_pectoris, los\_mi\_stay, d\_analgesic\_opioid, phadld, and d\_Anticoagulant\_cou (see Supplementary Table S2 for a label and description of each covariate).



**Supplementary Table S8.** Effect of the number of medication classes after excluding antiplatelet agents (beta-blockers, statins, and renin-angiotensin-aldosterone system inhibitors only) from the exposure definition (N=4,634).

*In a third stability analysis, we excluded users of antiplatelet agents because aspirin is a recommended antiplatelet agent (in addition to clopidogrel, or more rarely, as an alternative), but is available without a prescription and thus underascertained in Medicare claims, which could result in biased estimates.*

| <b>Outcome</b>     | <b>No. of Medications</b> | <b>Events / n</b> | <b>Risk (%)</b> | <b>Crude OR (95% CI)</b> | <b>IPTW OR (95% CI)</b> |
|--------------------|---------------------------|-------------------|-----------------|--------------------------|-------------------------|
| Mortality          | 1                         | 254 / 2084        | 12.2            | Reference                | Reference               |
|                    | 2                         | 174 / 1741        | 10.0            | 0.80 (0.65-0.98)         | 0.87 (0.71-1.07)        |
|                    | 3                         | 61 / 809          | 7.5             | 0.59 (0.44-0.79)         | 0.71 (0.52-0.97)        |
| Rehospitalization  | 1                         | 521 / 2084        | 25.0            | Reference                | Reference               |
|                    | 2                         | 444 / 1741        | 25.5            | 0.99 (0.86-1.15)         | 0.92 (0.79-1.07)        |
|                    | 3                         | 220 / 809         | 27.2            | 1.05 (0.87-1.26)         | 0.96 (0.79-1.18)        |
| Functional Decline | 1                         | 293 / 2084        | 14.1            | Reference                | Reference               |
|                    | 2                         | 333 / 1741        | 19.1            | 1.41 (1.19-1.68)         | 1.27 (1.07-1.53)        |
|                    | 3                         | 172 / 809         | 21.3            | 1.57 (1.27-1.94)         | 1.30 (1.03-1.63)        |

Abbreviations: OR, odds ratio; CI, confidence interval; IPTW, inverse probability of treatment-weighted.

1 **Supplementary Figure S1.** Flow diagram of study participant inclusion and exclusion.

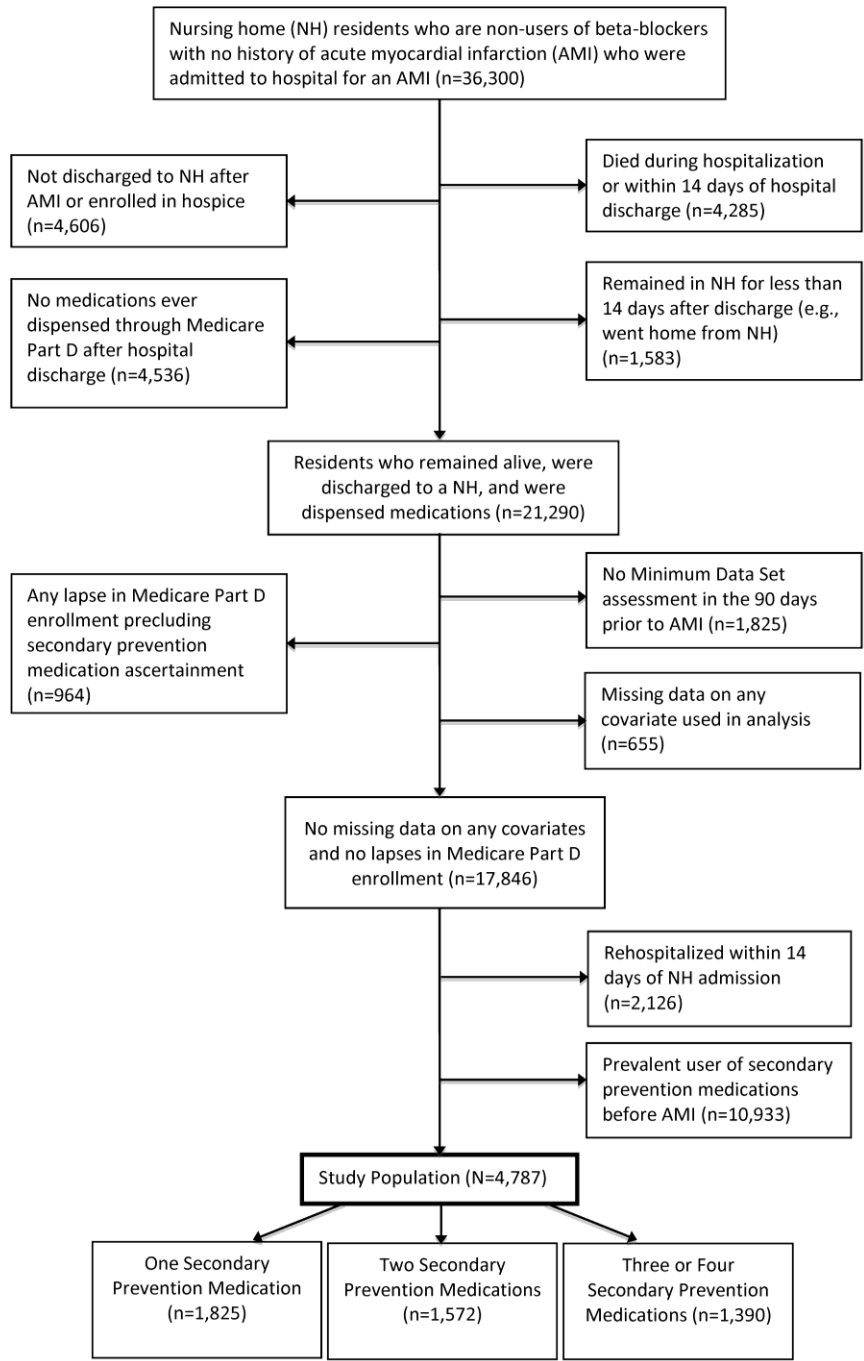

## Supplementary Material References

1. Steinman MA, Zullo AR, Lee Y, Daiello LA, Boscardin WJ, Dore DD, Gan S, Fung K, Lee SJ, Komaiko KD and Mor V. Association of beta-Blockers With Functional Outcomes, Death, and Rehospitalization in Older Nursing Home Residents After Acute Myocardial Infarction. *JAMA internal medicine*. 2017;177:254-262.
2. Zullo AR, Sharmin S, Lee Y, Daiello LA, Shah NR, John Boscardin W, Dore DD, Lee SJ and Steinman MA. Secondary Prevention Medication Use After Myocardial Infarction in U.S. Nursing Home Residents. *Journal of the American Geriatrics Society*. 2017;65:2397-2404.
3. Zullo AR, Lee Y, Daiello LA, Mor V, John Boscardin W, Dore DD, Miao Y, Fung KZ, Komaiko KDR and Steinman MA. Beta-Blocker Use in U.S. Nursing Home Residents After Myocardial Infarction: A National Study. *Journal of the American Geriatrics Society*. 2017;65:754-762.
4. Southern DA, Quan H and Ghali WA. Comparison of the Elixhauser and Charlson/Deyo methods of comorbidity measurement in administrative data. *Medical care*. 2004;42:355-60.
5. Carpenter GI, Hastie CL, Morris JN, Fries BE and Ankri J. Measuring change in activities of daily living in nursing home residents with moderate to severe cognitive impairment. *BMC geriatrics*. 2006;6:7.
6. Morris JN, Fries BE, Mehr DR, Hawes C, Phillips C, Mor V and Lipsitz LA. MDS Cognitive Performance Scale. *J Gerontol*. 1994;49:M174-82.
7. Mor V. A comprehensive clinical assessment tool to inform policy and practice: applications of the minimum data set. *Medical care*. 2004;42:III50-9.
8. Morris JN, Fries BE and Morris SA. Scaling ADLs within the MDS. *The journals of gerontology Series A, Biological sciences and medical sciences*. 1999;54:M546-53.

9. Cole SR and Hernán MA. Constructing inverse probability weights for marginal structural models. *American journal of epidemiology*. 2008;168:656-64.
